# Supplementary material for: Carbonate: an alternative dopant to stabilize new perovskite phases; synthesis and structure of Ba3Yb2O5CO3 and related isostructural phases Ba3Ln2O5CO3 (Ln = Y, Dy, Ho, Er, Tm and Lu)
Source: Royal Society of Chemistry journal article supplement (doi:10.1039/c8dt02691b), 2018-01-01
Supplement: c8dt02691b1.pdf [file c8dt02691b1.pdf]

**Carbonate: an alternative dopant to stabilize new perovskite phases;  
Synthesis and structure of  $\text{Ba}_3\text{Yb}_2\text{O}_5\text{CO}_3$  and related isostructural  
phases  $\text{Ba}_3\text{Ln}_2\text{O}_5\text{CO}_3$  (Ln=Y, Dy, Ho, Er, Tm and Lu).**

Joshua Deakin<sup>1</sup>, Ivan Trussov<sup>1</sup>, Alexandra Gibbs<sup>2</sup>, Emma Kendrick<sup>3</sup> and Peter R. Slater<sup>1,\*</sup>

<sup>1</sup>School of Chemistry, University of Birmingham, Birmingham, B15 2TT, UK.

<sup>2</sup>ISIS Facility, Rutherford Appleton Laboratory, Harwell Oxford, Didcot, OX11 0QX,  
UK.

<sup>3</sup>Warwick Manufacturing Group, University of Warwick, Coventry, CV4 7AL.  
UK

\* To whom the correspondence should be addressed: [p.r.slater@bham.ac.uk](mailto:p.r.slater@bham.ac.uk)  
**Tel.: +44 01214148609; fax: +44 01214144403**

### **Supplementary Information**

The information provided in this section is to be used in conjunction with the associated article. Within this section is the set of data showing the observed, calculated and difference profiles for the  $\text{Ba}_3\text{Ln}_2\text{O}_5\text{CO}_3$  (Ln = Lu, Tm, Er, Y, Ho and Dy) systems (**Supplementary Figures 1 – 6**).

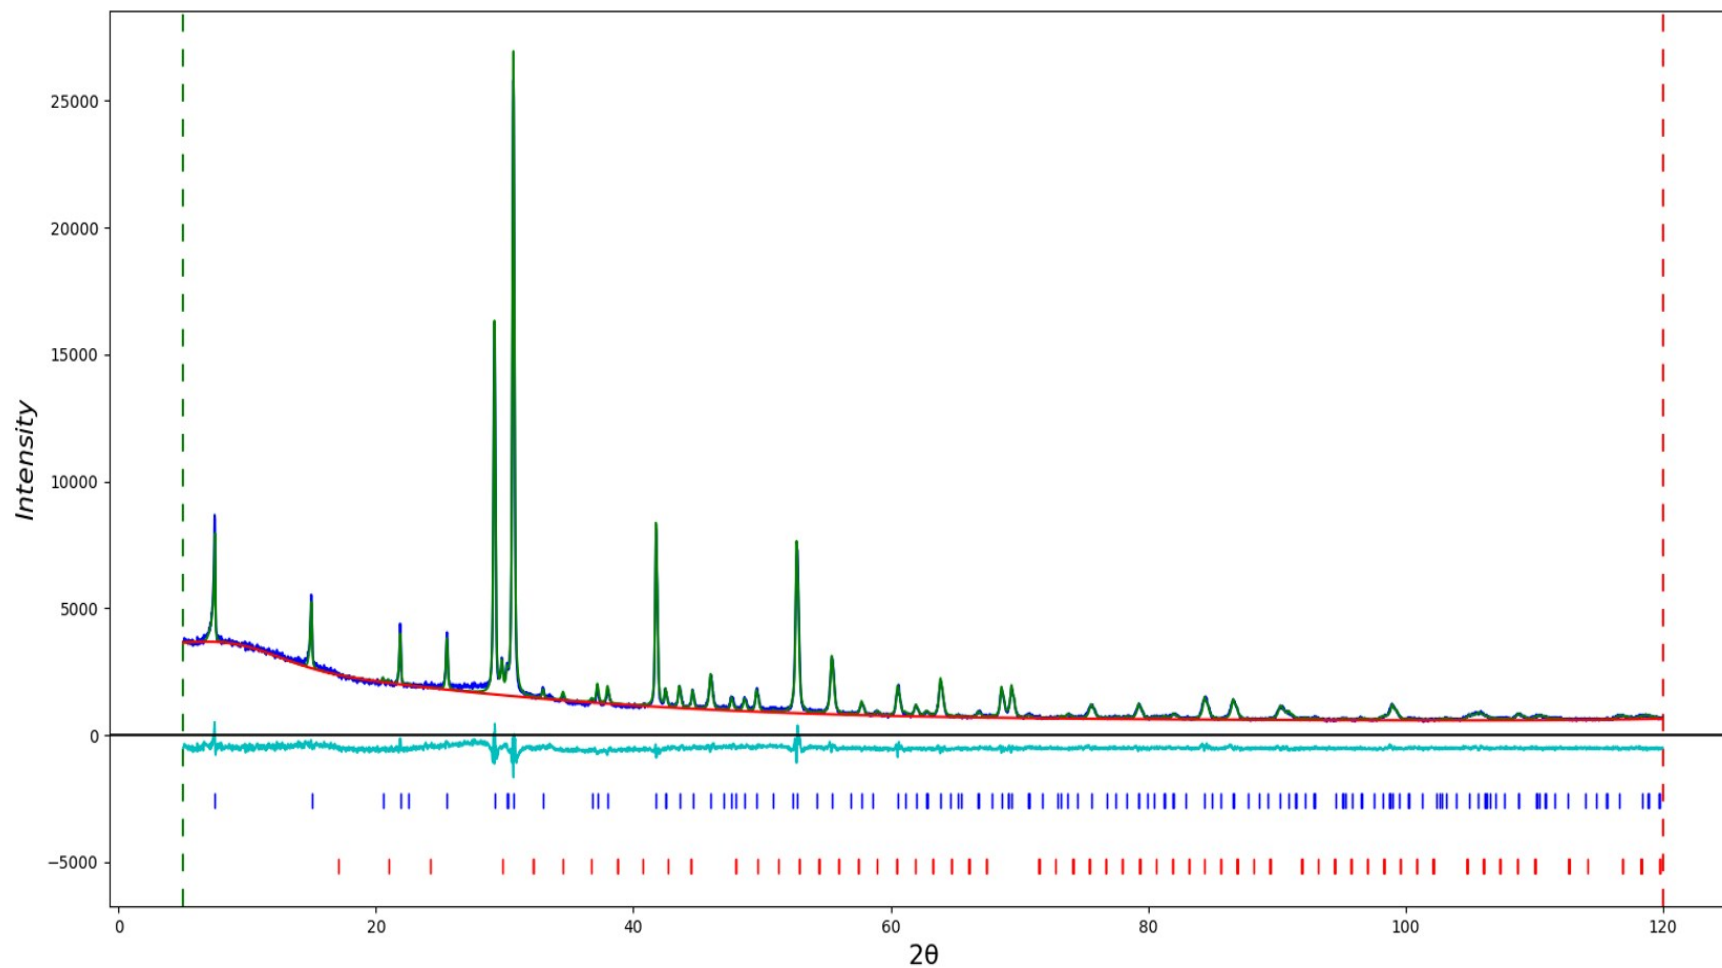

**Supplementary Figure 1:** Observed, calculated and difference x-ray diffraction profiles for  $\text{Ba}_3\text{Lu}_2\text{O}_5\text{CO}_3$ .

(Lower tick marks –  $\text{Lu}_2\text{O}_3$ , upper tick marks  $\text{Ba}_3\text{Lu}_2\text{O}_5\text{CO}_3$ )

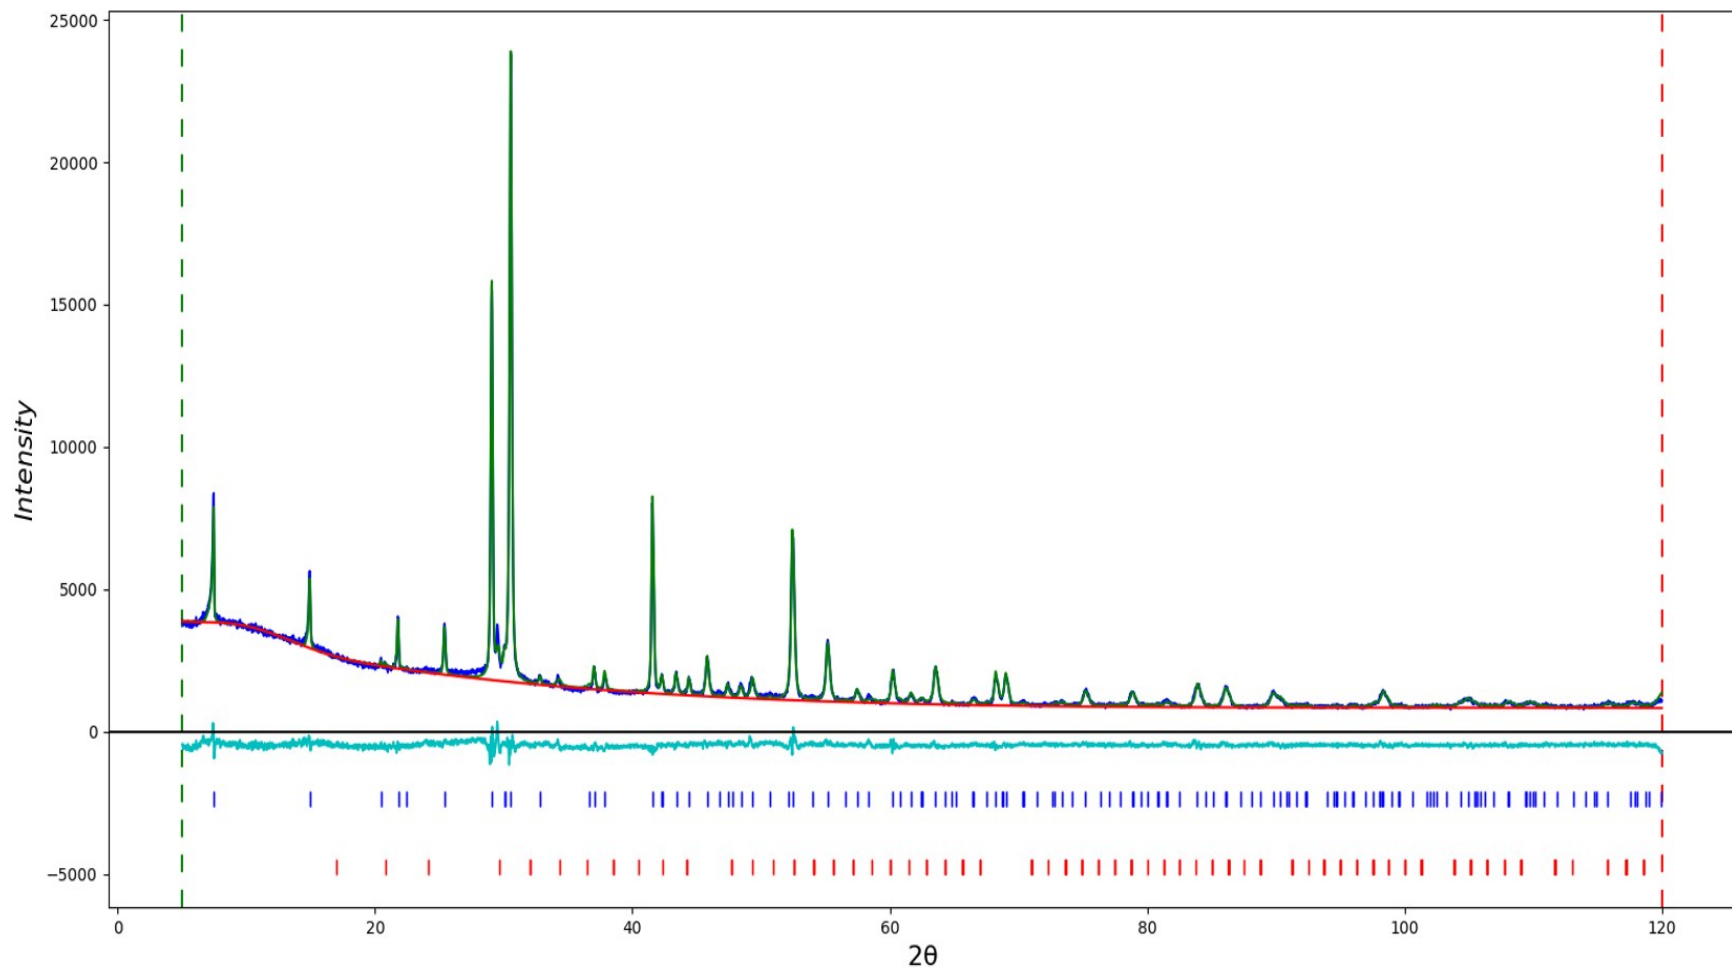

**Supplementary Figure 2:** Observed, calculated and difference x-ray diffraction profiles for  $\text{Ba}_3\text{Tm}_2\text{O}_5\text{CO}_3$ .

(Lower tick marks –  $\text{Tm}_2\text{O}_3$ , upper tick marks  $\text{Ba}_3\text{Tm}_2\text{O}_5\text{CO}_3$ )

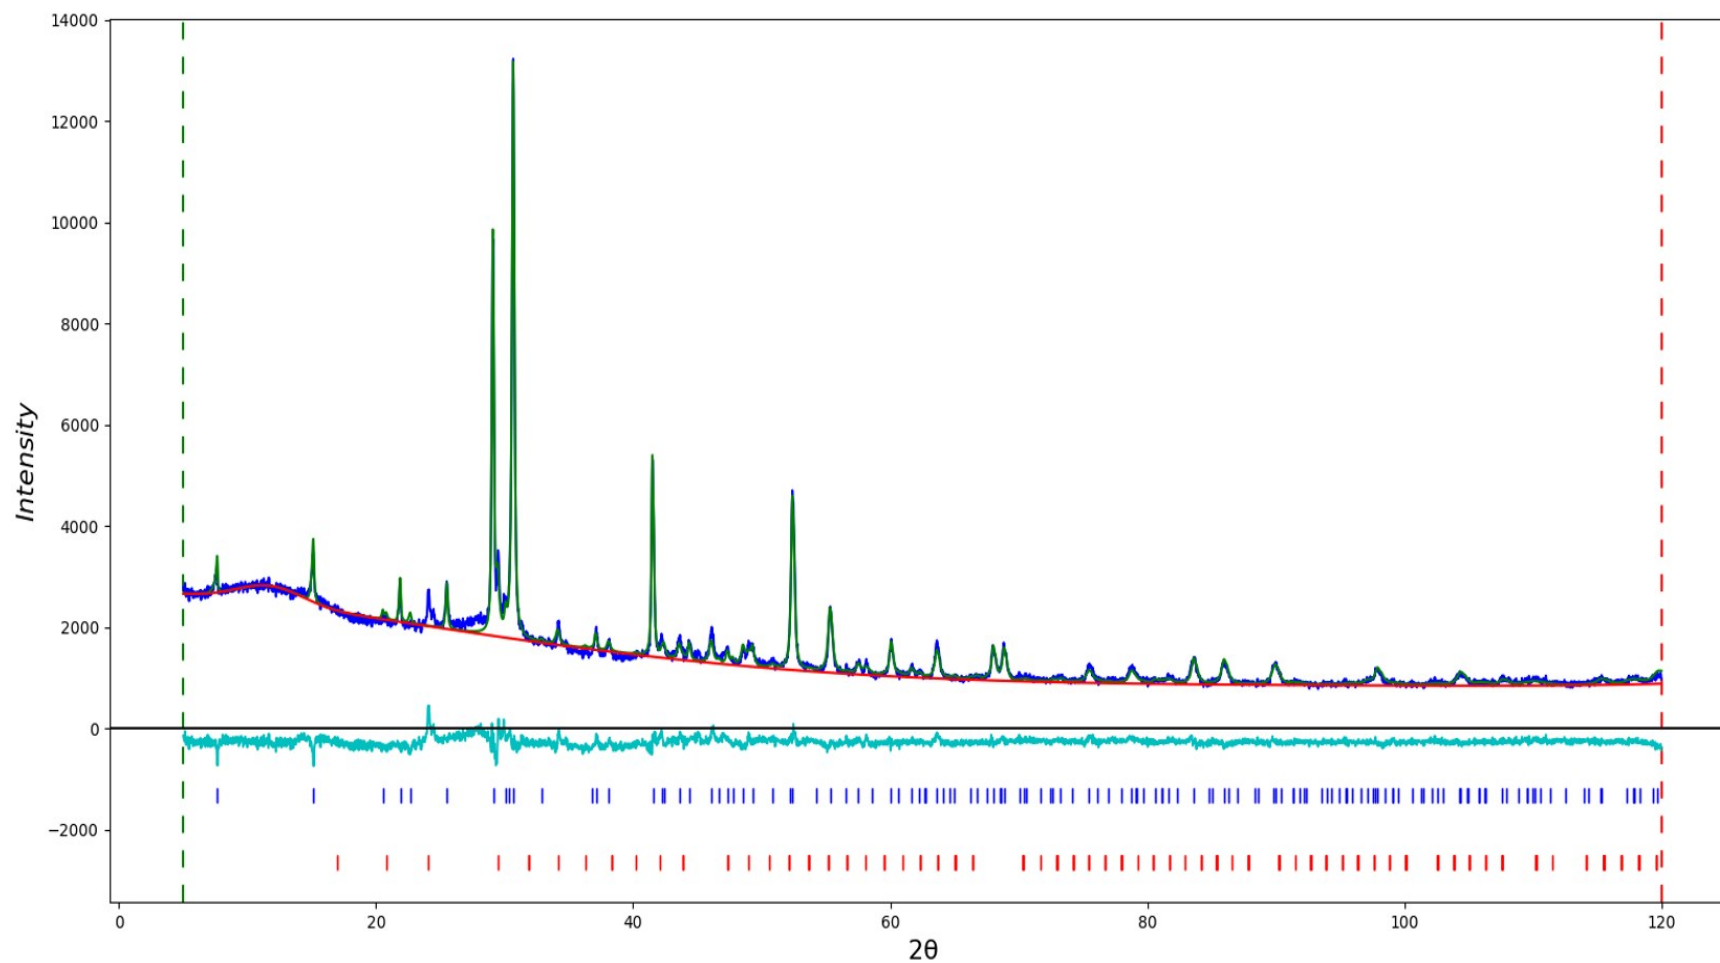

**Supplementary Figure 3:** Observed, calculated and difference x-ray diffraction profiles for  $\text{Ba}_3\text{Er}_2\text{O}_5\text{CO}_3$ .

(Lower tick marks –  $\text{Er}_2\text{O}_3$ , upper tick marks  $\text{Ba}_3\text{Er}_2\text{O}_5\text{CO}_3$ )

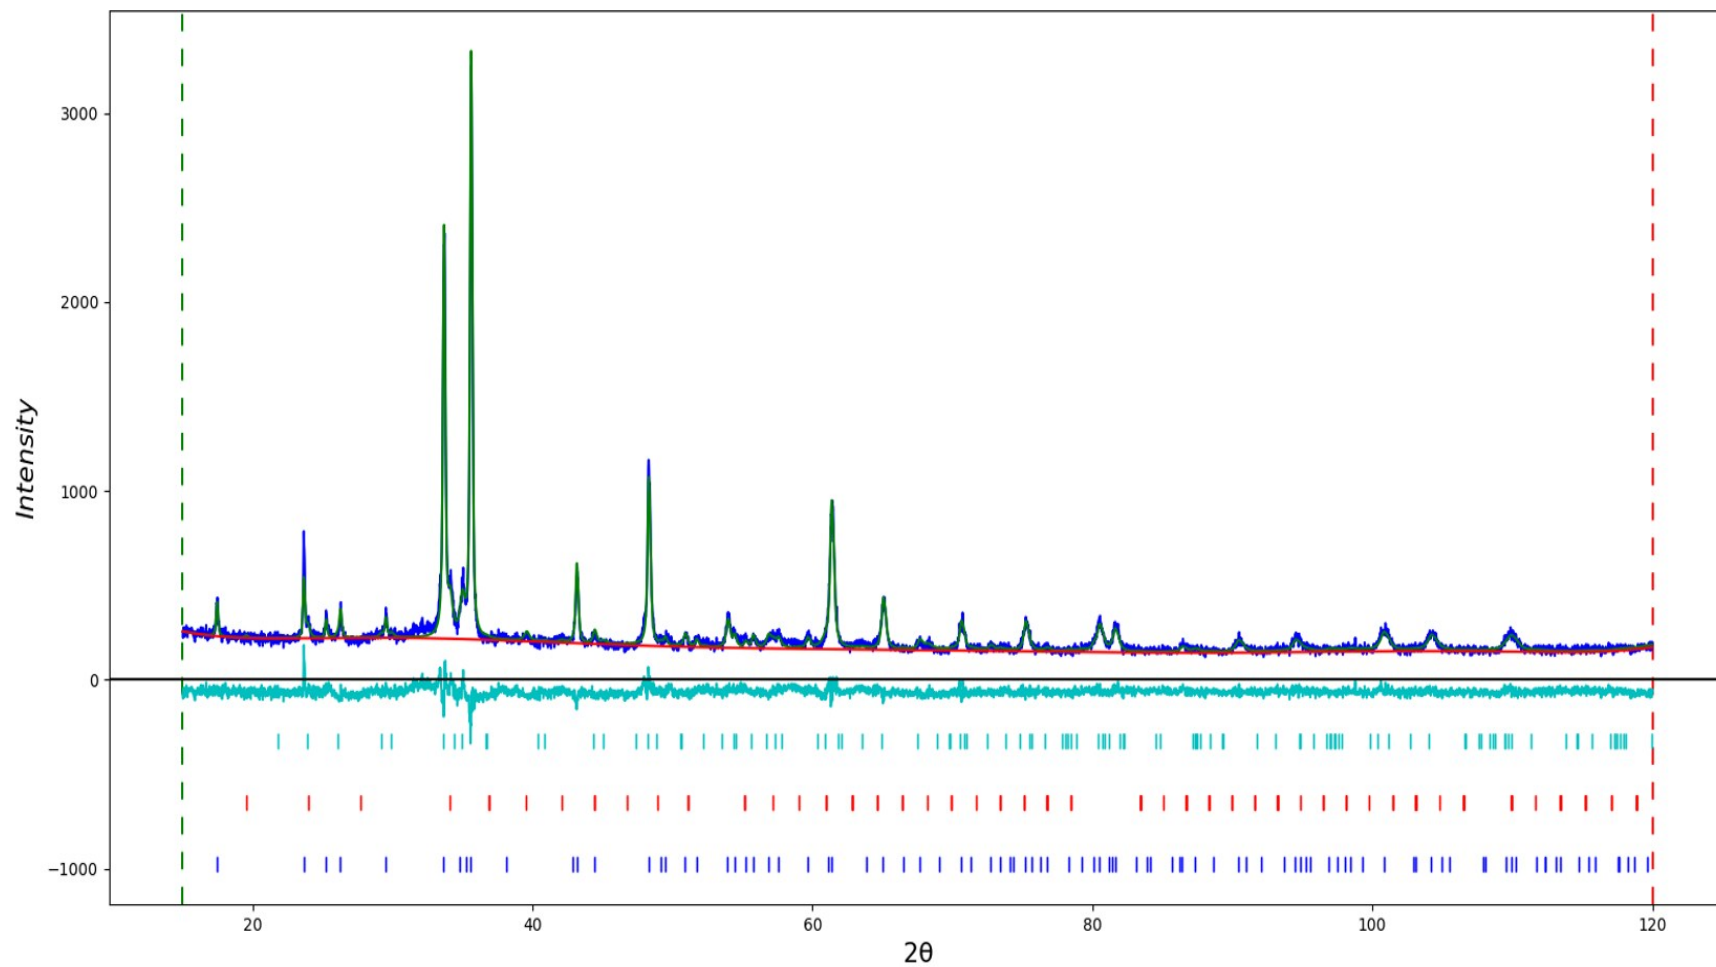

**Supplementary Figure 4:** Observed, calculated and difference x-ray diffraction profiles for  $\text{Ba}_3\text{Y}_2\text{O}_5\text{CO}_3$ .

(Lower tick marks –  $\text{Y}_2\text{O}_3$ , middle tick marks –  $\text{Ba}_3\text{Y}_4\text{O}_9$ , upper tick marks -  $\text{Ba}_3\text{Y}_2\text{O}_5\text{CO}_3$ )

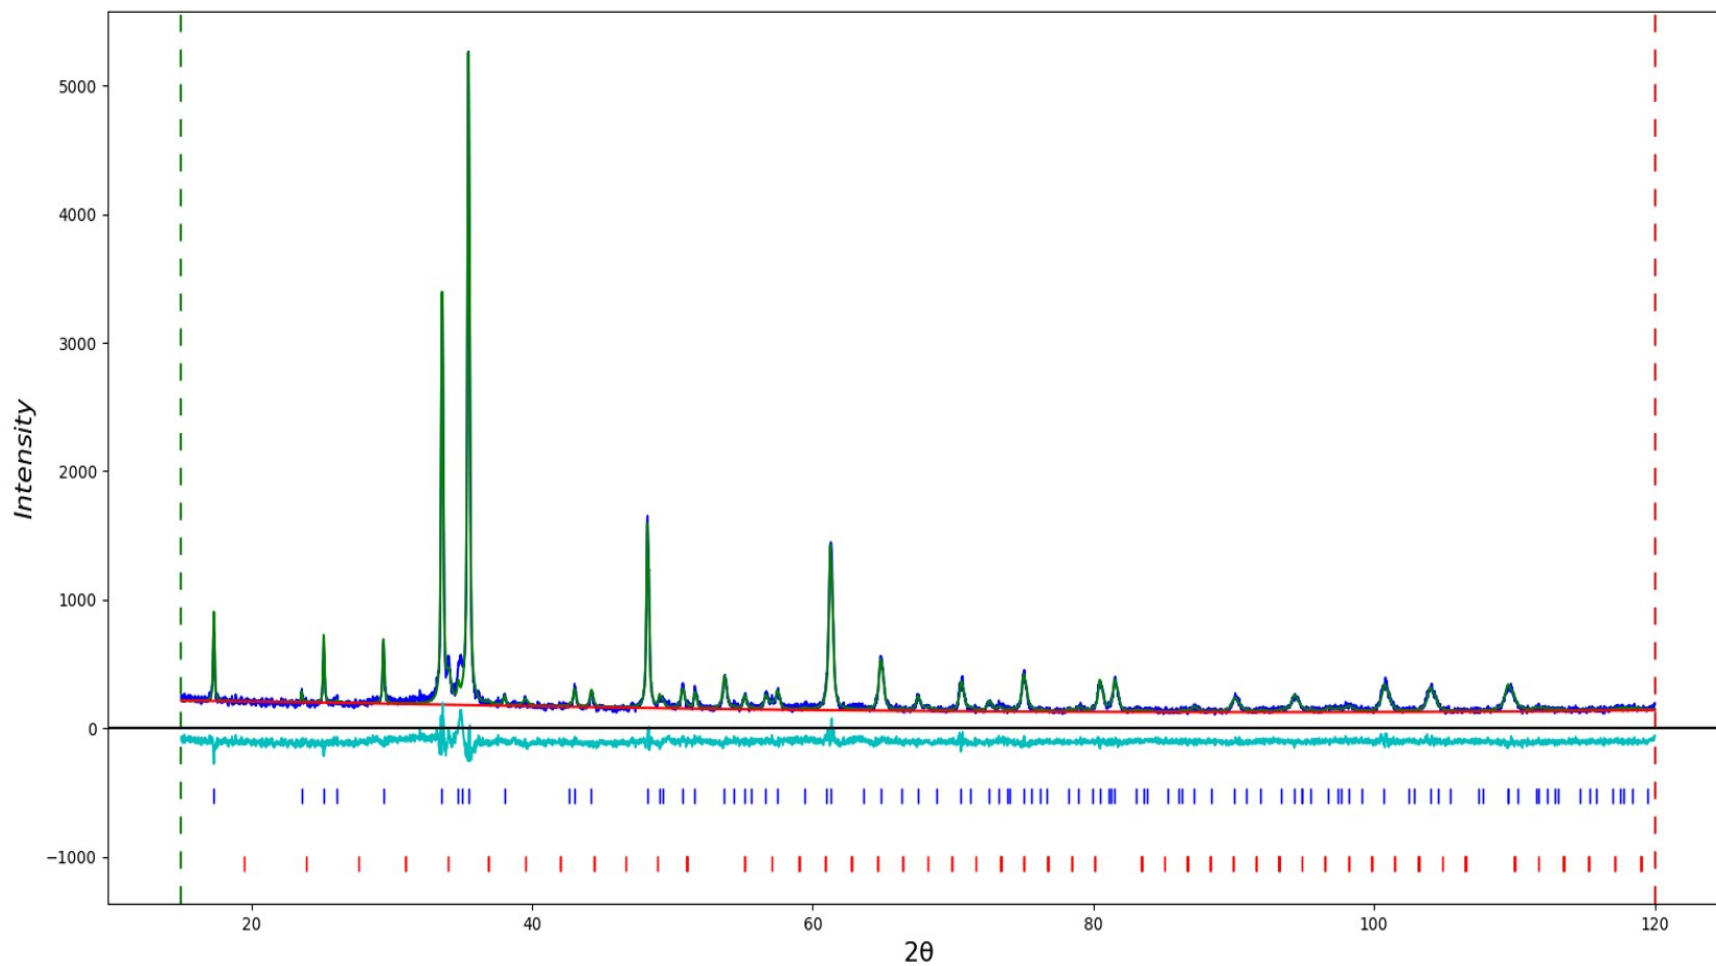

**Supplementary Figure 5:** Observed, calculated and difference x-ray diffraction profiles for  $\text{Ba}_3\text{Ho}_2\text{O}_5\text{CO}_3$ .

(Lower tick marks –  $\text{Ho}_2\text{O}_3$ , upper tick marks  $\text{Ba}_3\text{Ho}_2\text{O}_5\text{CO}_3$ )

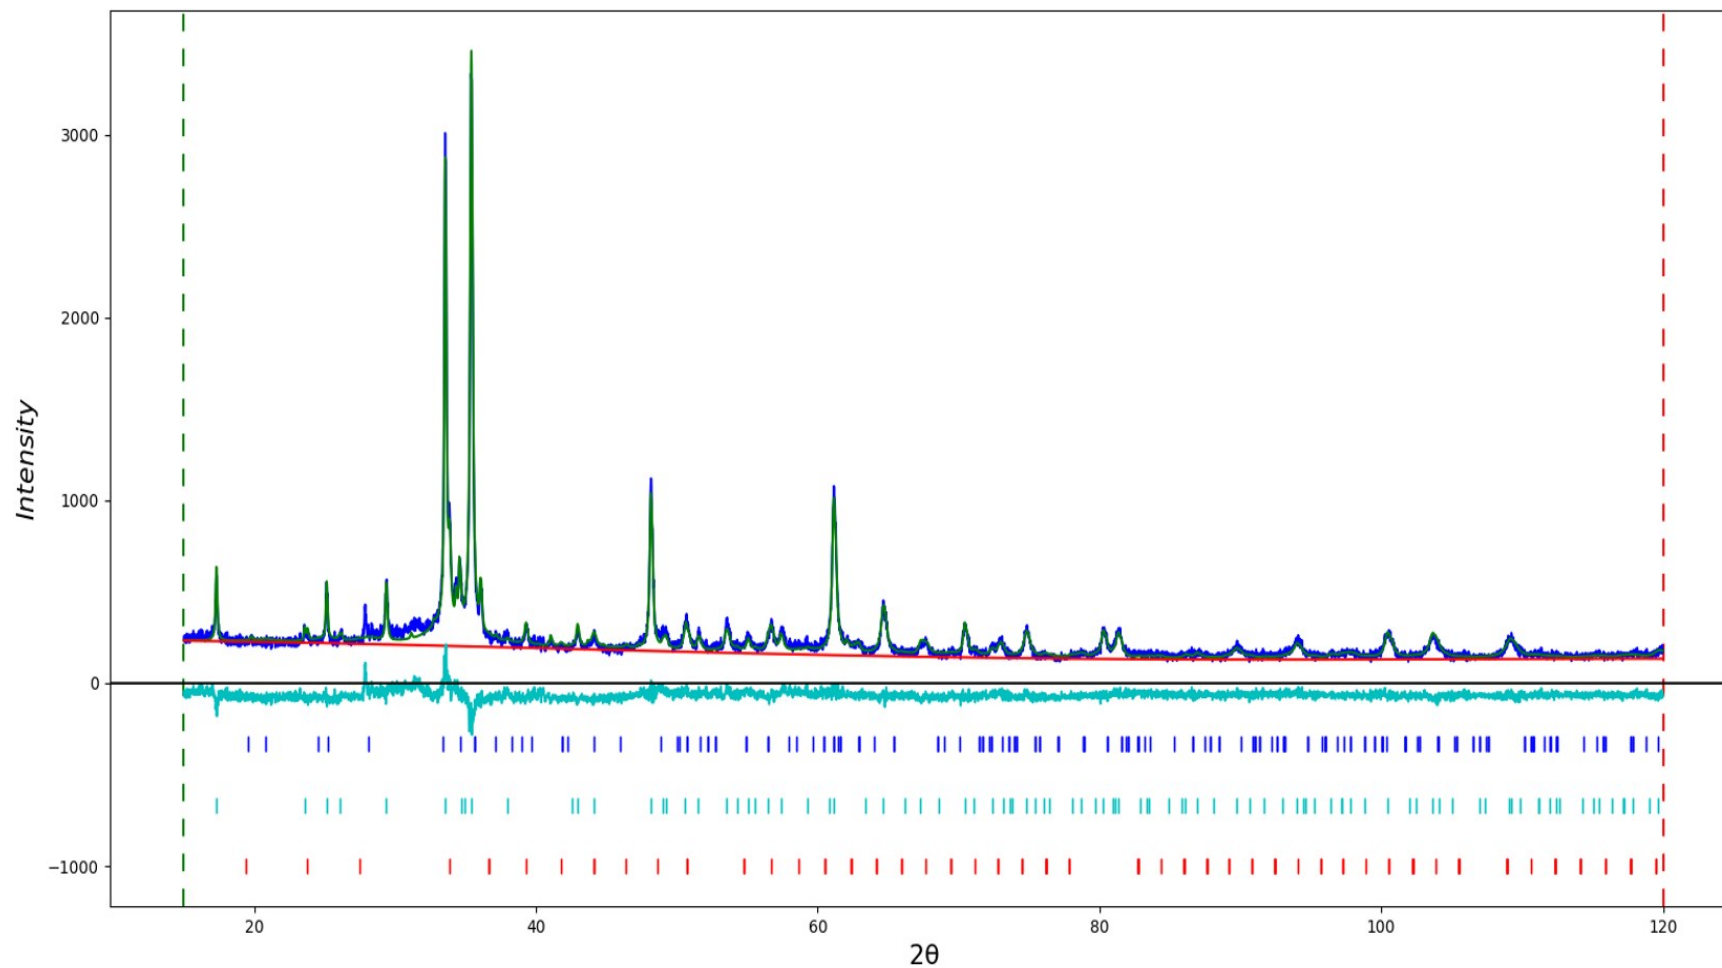

**Supplementary Figure 6:** Observed, calculated and difference x-ray diffraction profiles for  $\text{Ba}_3\text{Dy}_2\text{O}_5\text{CO}_3$ .

(Lower tick marks –  $\text{Dy}_2\text{O}_3$ , middle tick marks –  $\text{Ba}_3\text{Dy}_4\text{O}_9$ , upper tick marks  $\text{Ba}_3\text{Dy}_2\text{O}_5\text{CO}_3$ )
